# Supplementary material
Source: PubMed Central journal article supplement (PMC3187087)
Supplement: supp_77_19_6780__1.pdf [file supp_77_19_6780__1.pdf]

Supplemental documents

**Macroscopic Biofilms in Fracture-Dominated Sediment that Anaerobically Oxidize Methane**

Authors: Brandon R. Briggs, John W. Pohlman, Marta Torres, Michael Riedel, Eoin L. Brodie, Frederick S. Colwell

Oregon State University, 104 COAS Administration Building  
Corvallis, OR 97331

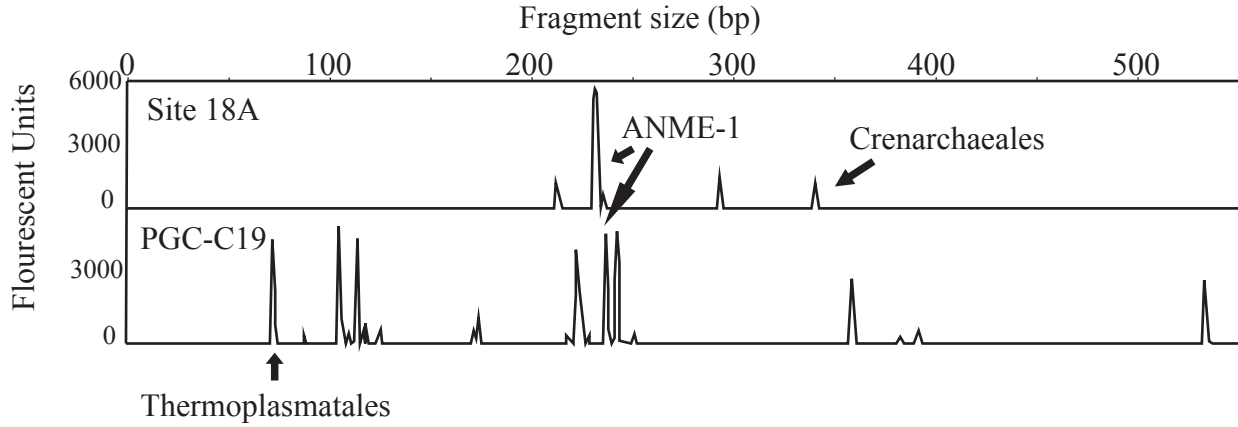

Figure S1. Representative electropherograms obtained from archaeal terminal restriction fragment length polymorphism analysis from the biofilms at Site 18A (India) and PGC0807 (NCM). In silico digestion was performed on clone sequences and compared to peak sizes to determine the probable identity of archaeal peaks.

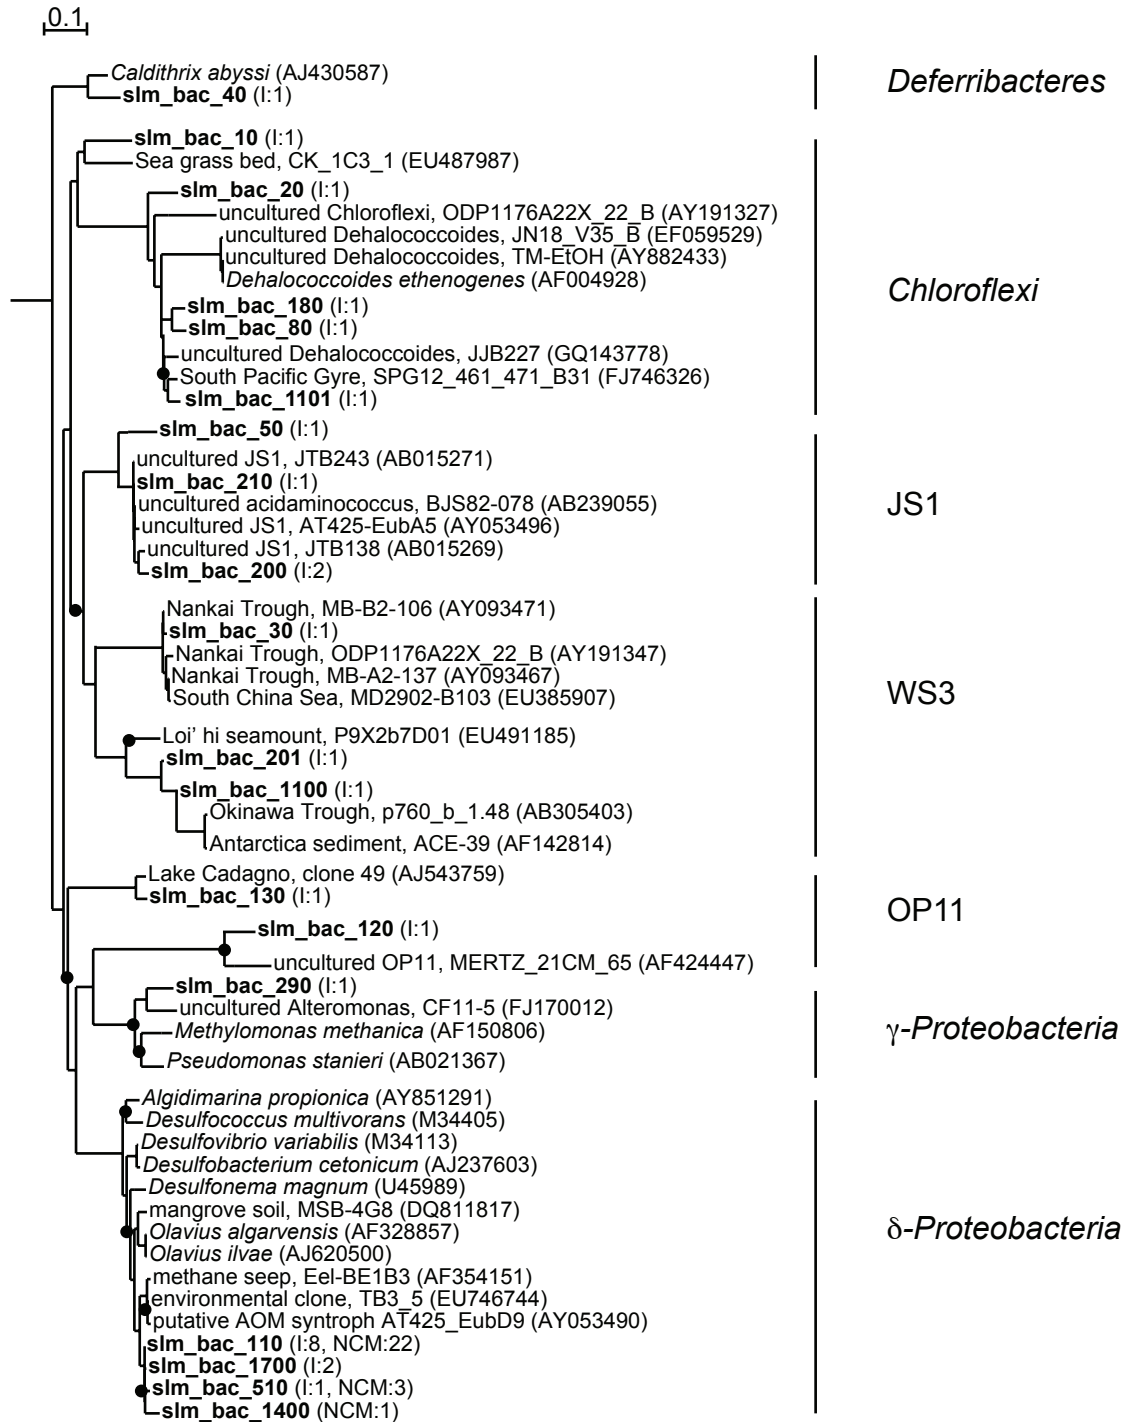

Figure S2. Neighbor-joining distance tree (created in FastTree (S1)) showing representative bacterial phylotypes derived from DNA extracted from subsurface biofilms and then amplified (using 16S rRNA gene primers) and cloned. Representative biofilm phylotypes from this study are indicated in bold type. The solid circles at nodes indicate bootstrap values <40%. The designations in parentheses after the biofilm phylotypes indicate the number of clones obtained for a particular phylotype from either sediments from offshore India (I) or the northern Cascadia Margin (NCM).

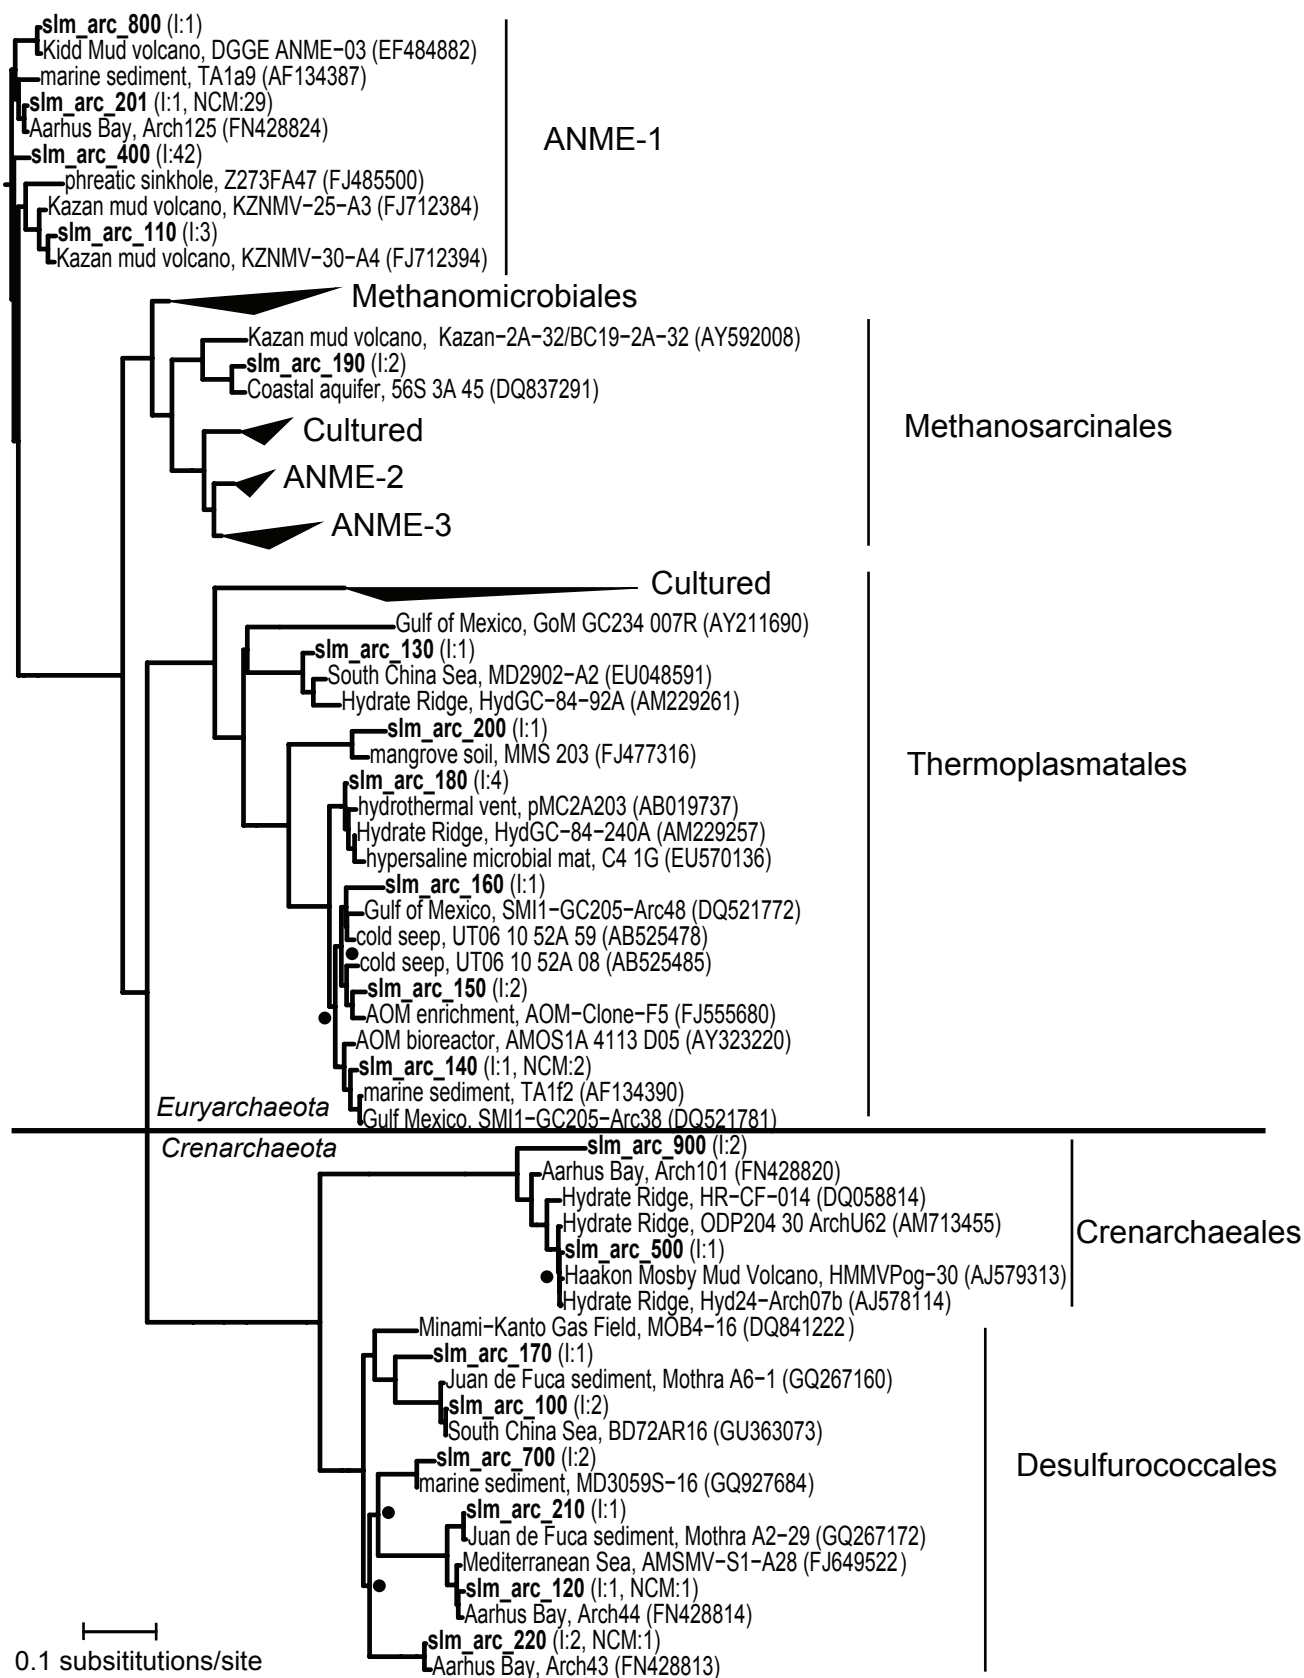

Figure S3. Neighbor-joining distance tree (created in FastTree (S1)) showing representative archaeal phylotypes derived from DNA extracted from subseafloor biofilms and then amplified (using 16S rRNA gene primers) and cloned. Representative biofilm phylotypes from this study are indicated in bold type. The solid circles at nodes indicate bootstrap values <40%. The designations in parentheses after the biofilm phylotypes indicate the number of clones obtained for a particular phylotype from either sediments from offshore India (I) or the northern Cascadia Margin (NCM).

## Supplemental References

- S1. Price, M. N., P. S. Dehal, and A. P. Arkin.** 2009. FastTree: computing large minimum evolution trees with profiles instead of a distance matrix. *Mol. Biol. Evol.* **26**:1641-50.
